# Supplementary material
Source: PubMed Central journal article supplement (PMC2842143)

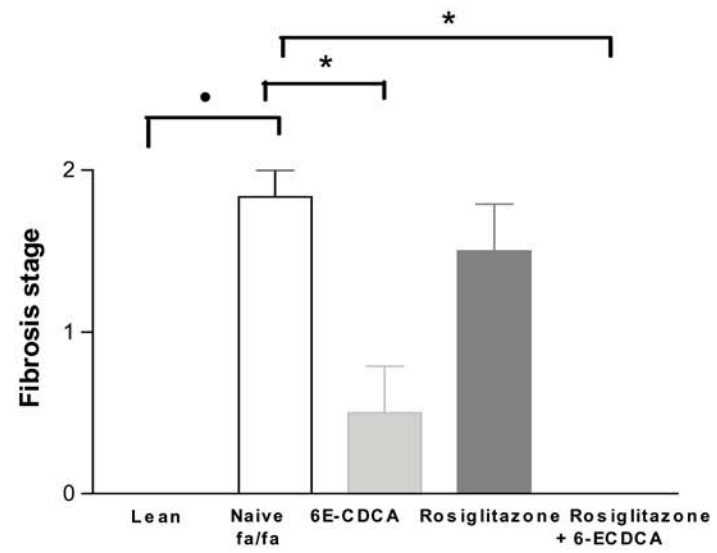

Suppl Fig. 1

Supplement: M001602_1.pdf [file M001602_1.pdf]
